# Supplementary material for: HDAC1 dysregulation induces aberrant cell cycle and DNA damage in progress of TDP‐43 proteinopathies
Source: PubMed Central journal article supplement (PMC7278561; doi:10.15252/emmm.201910622), 2020-05-25

# Fig. 1A-1

WT

Ki67

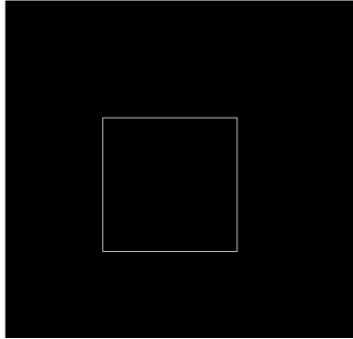

TDP-43

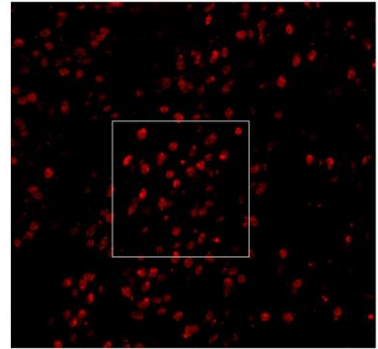

Merge

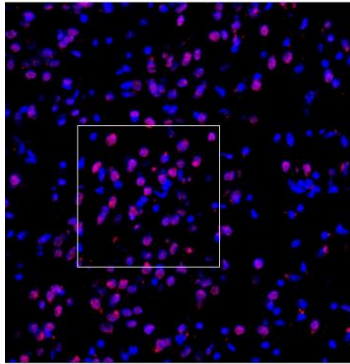

Tg

Ki67

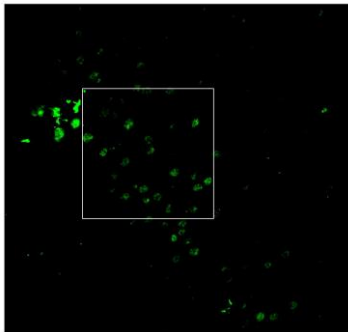

TDP-43

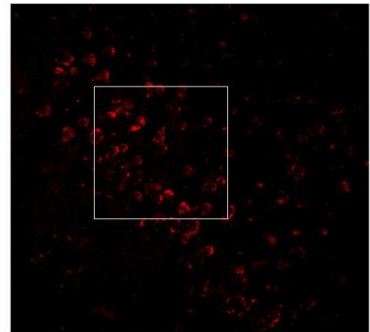

Merge

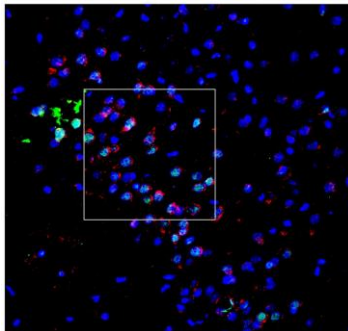

# Fig. 1A-2

WT

Ki67

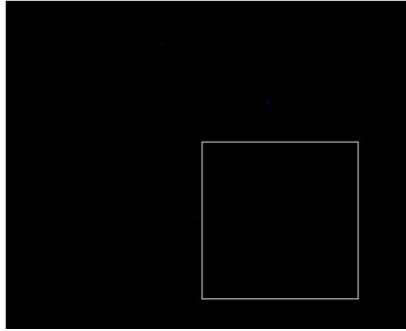

TDP-43

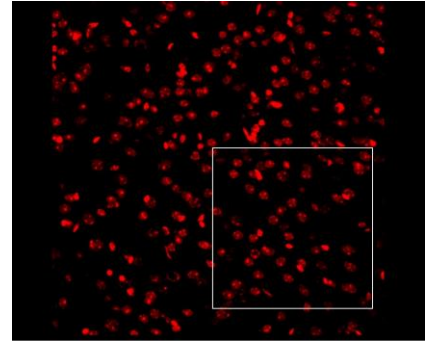

Merge

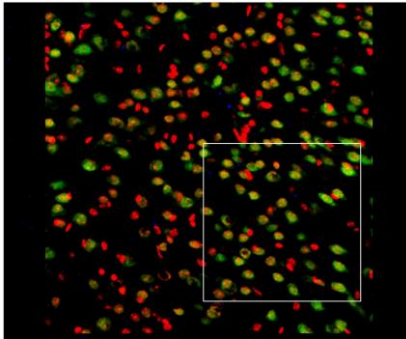

Tg

Ki67

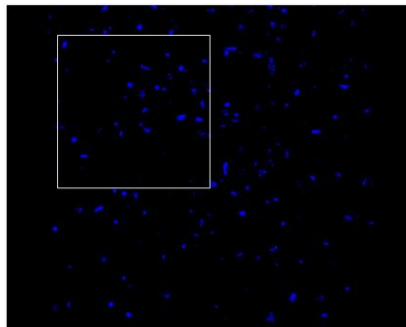

TDP-43

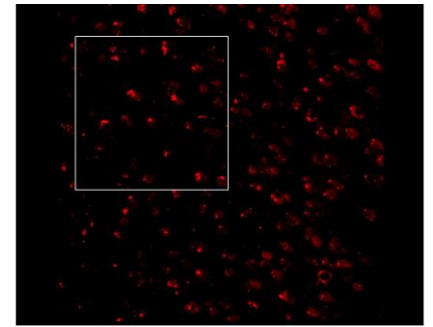

Merge

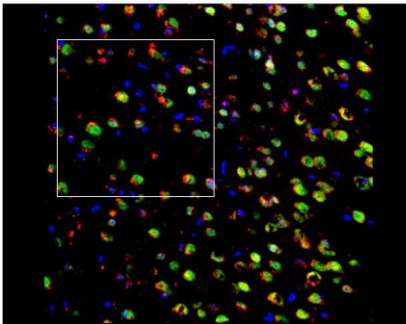

**Fig. 1C**

**E2F1**

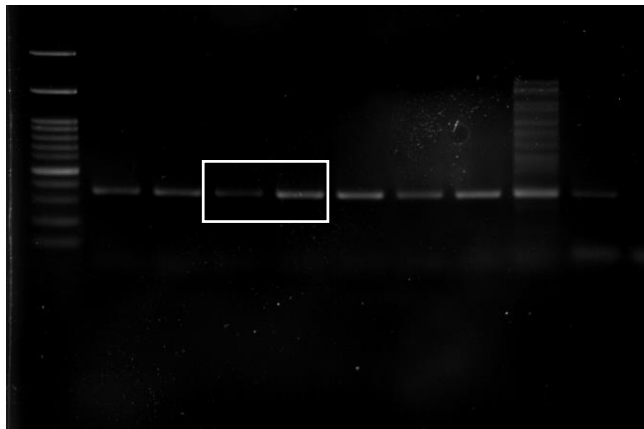

**Cyclin E**

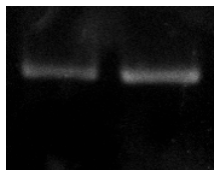

**p21**

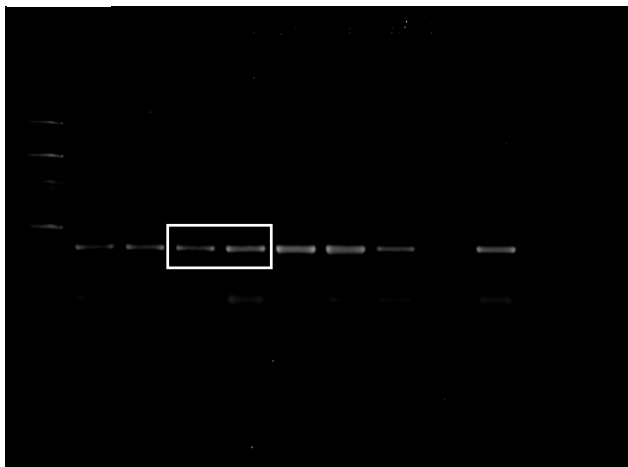

**PCNA**

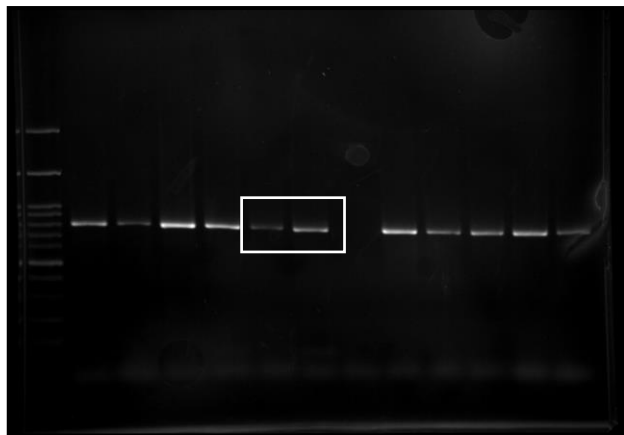

**GAPDH**

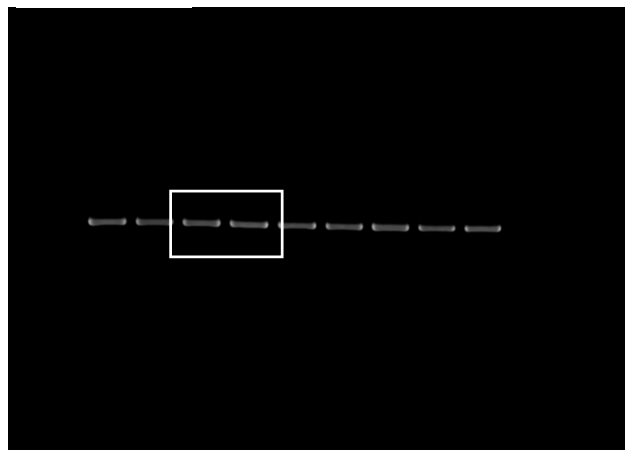

**Fig. 1C**

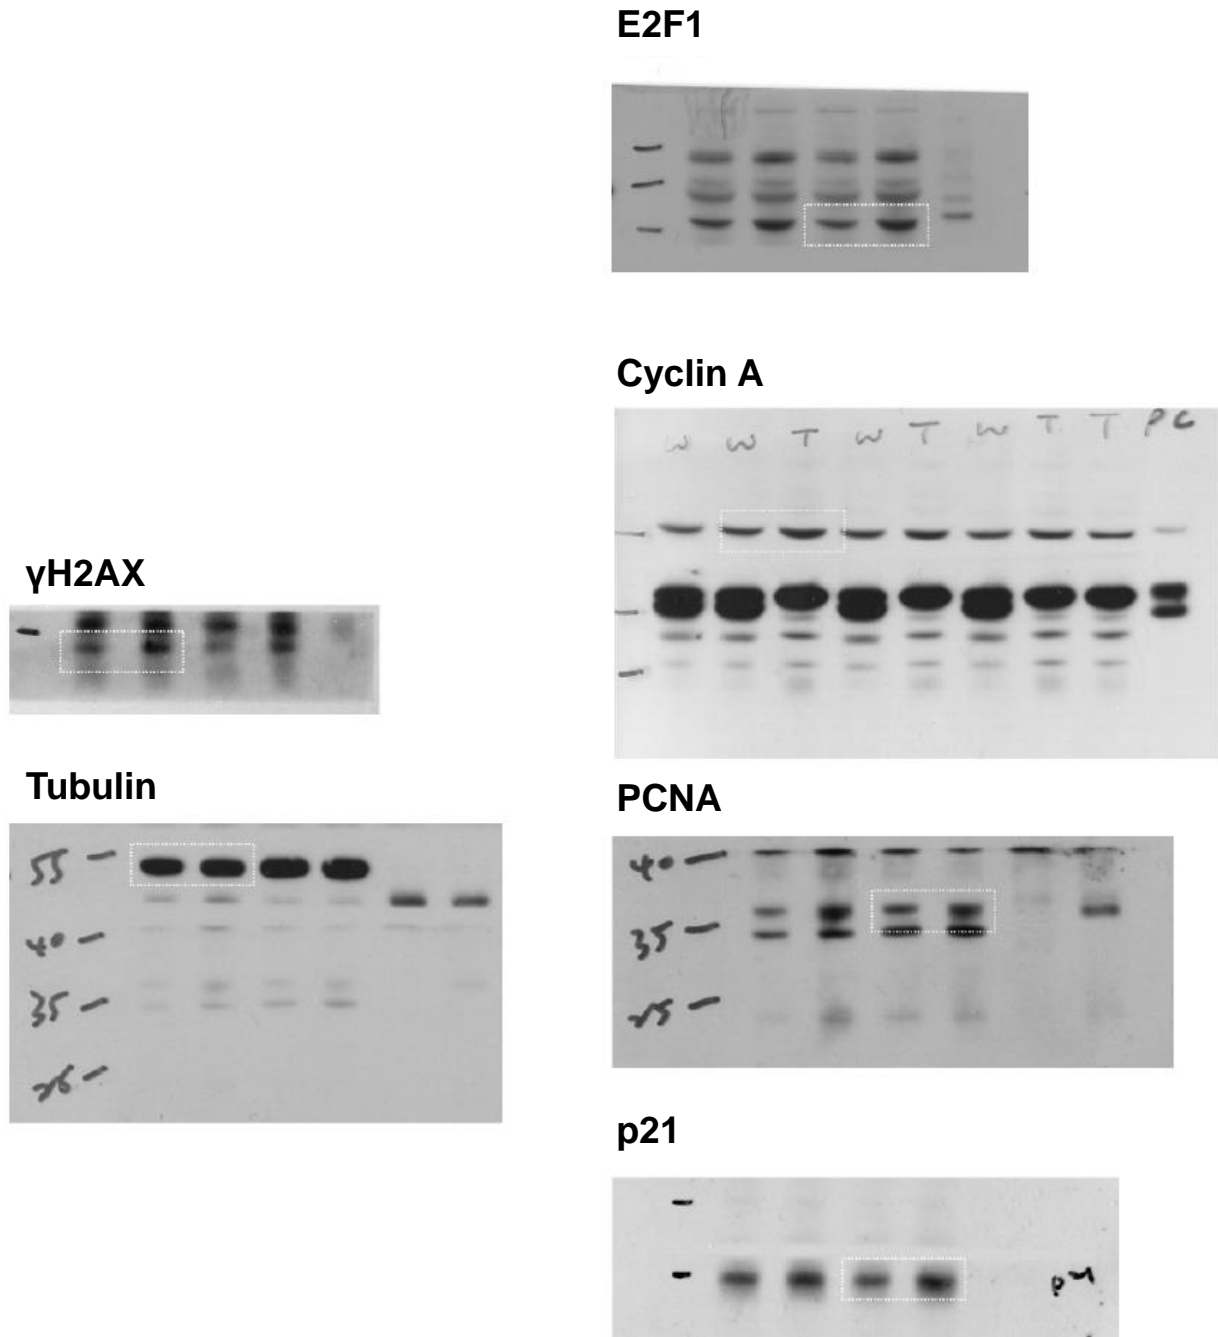

Supplement: EMMM-12-e10622-s003.pdf [file EMMM-12-e10622-s003.pdf]
