# Supplementary material for: HDAC1 dysregulation induces aberrant cell cycle and DNA damage in progress of TDP‐43 proteinopathies
Source: PubMed Central journal article supplement (PMC7278561; doi:10.15252/emmm.201910622), 2020-05-25

**Fig. 2A**

**WT**

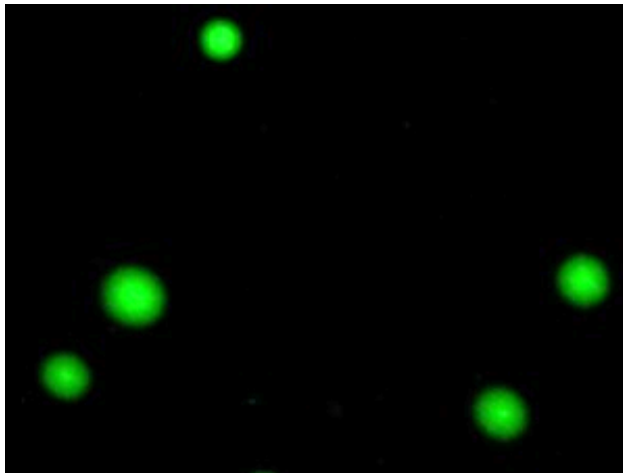

**Tg**

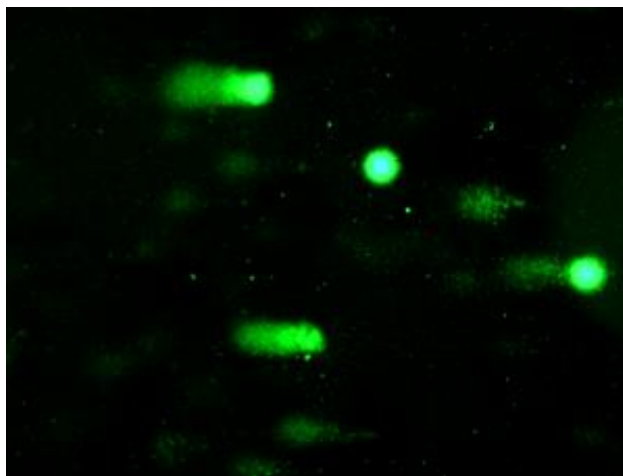

# Fig. 2B-1

WT  $\gamma$ H2AX

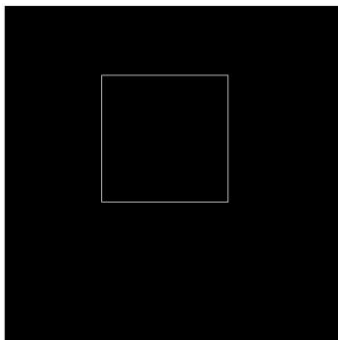

TDP-43

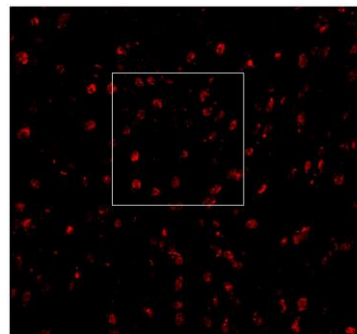

Merge

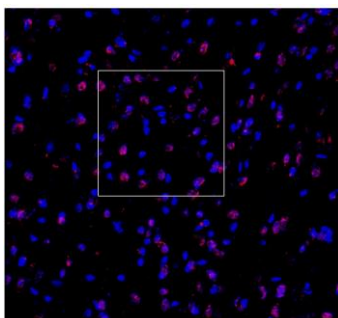

Tg  $\gamma$ H2AX

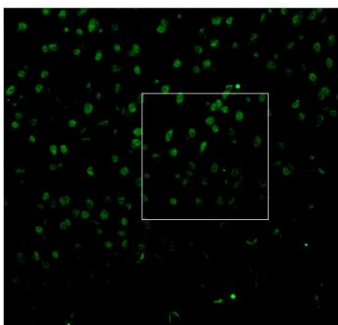

TDP-43

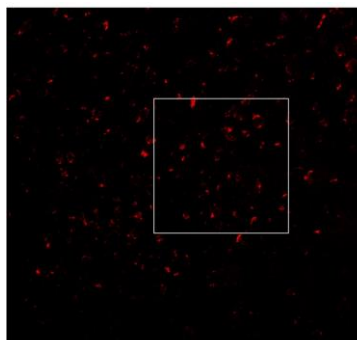

Merge

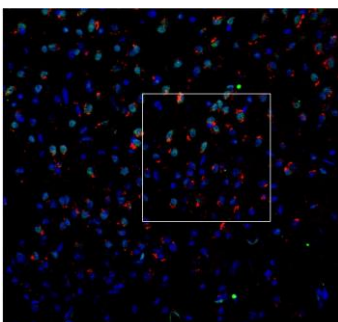

## Fig. 2B-2

WT  $\gamma$ H2AX

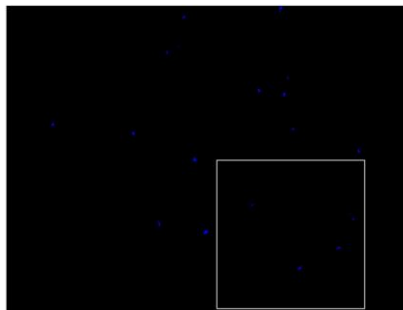

Merge

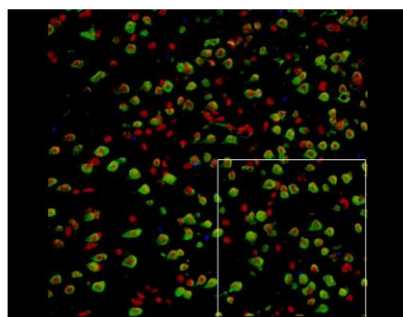

TDP-43

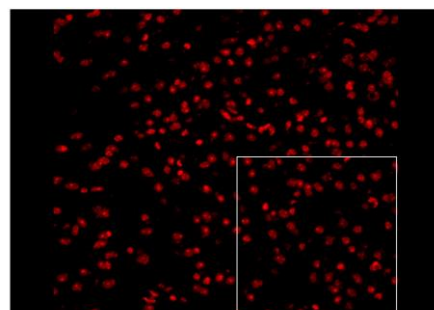

Tg  $\gamma$ H2AX

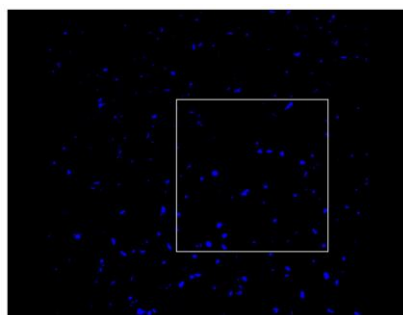

Merge

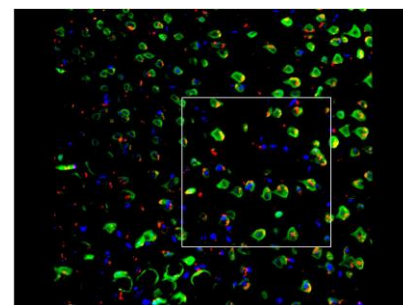

TDP-43

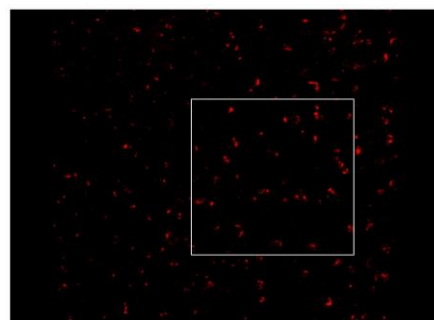

# Fig. 2C-1

WT  $\gamma$ H2AX

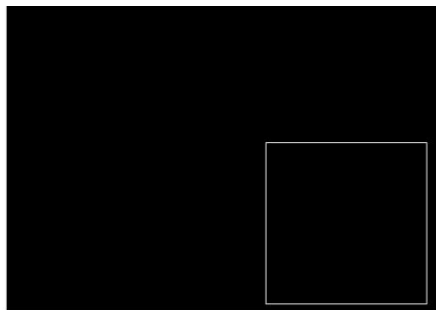

Merge

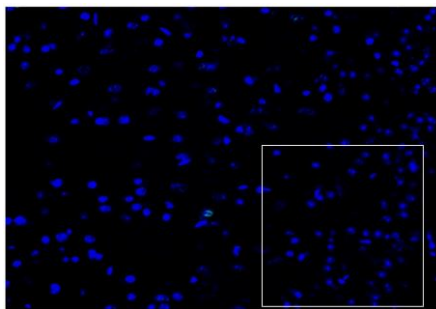

Ki67

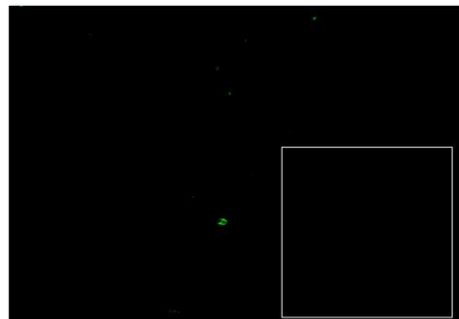

Tg  $\gamma$ H2AX

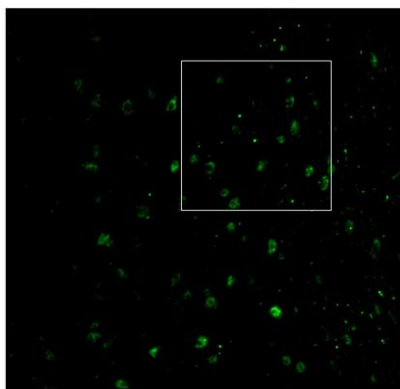

Merge

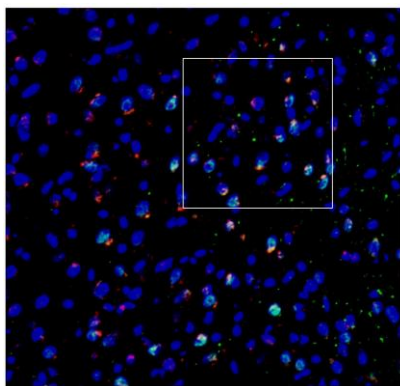

Ki67

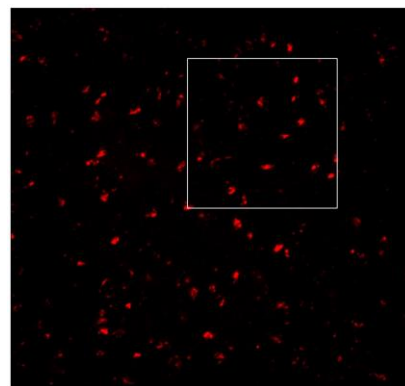

# Fig. 2C-2

WT  $\gamma$ H2AX

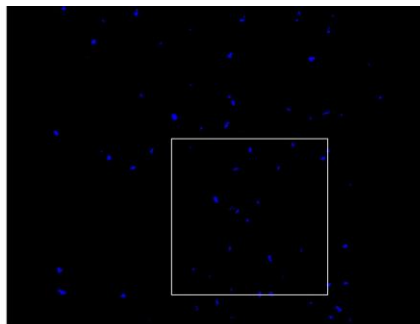

Ki67

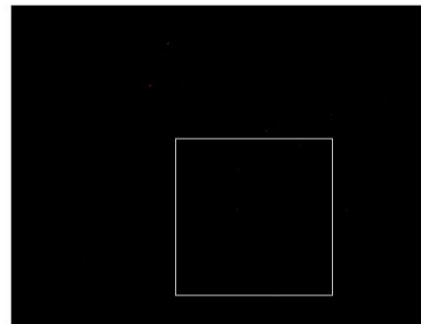

Merge

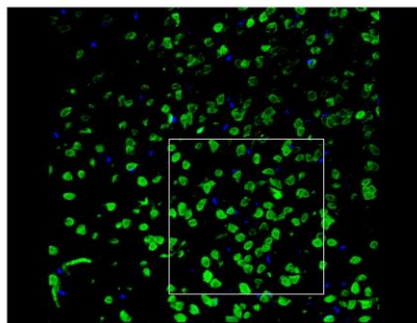

Tg  $\gamma$ H2AX

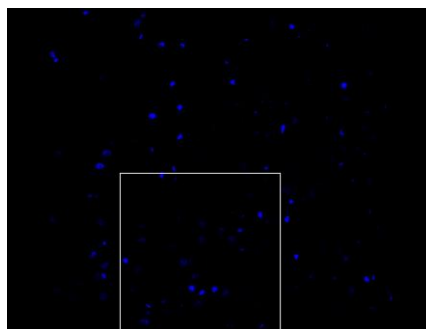

Ki67

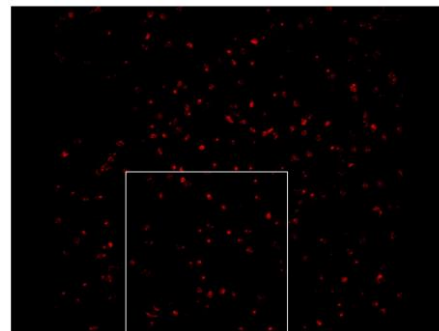

Merge

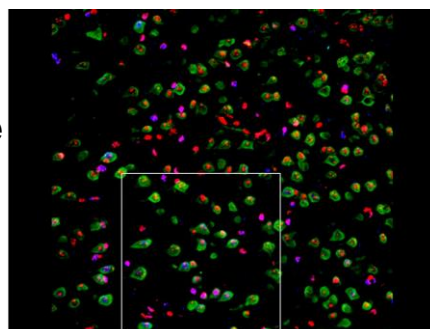

Supplement: EMMM-12-e10622-s004.pdf [file EMMM-12-e10622-s004.pdf]
