# Supplementary material for: HDAC1 dysregulation induces aberrant cell cycle and DNA damage in progress of TDP‐43 proteinopathies
Source: PubMed Central journal article supplement (PMC7278561; doi:10.15252/emmm.201910622), 2020-05-25

**Fig. 3A**

**HDAC1**

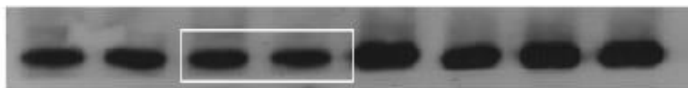

**Tubulin**

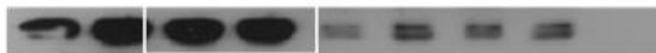

**TDP-43**

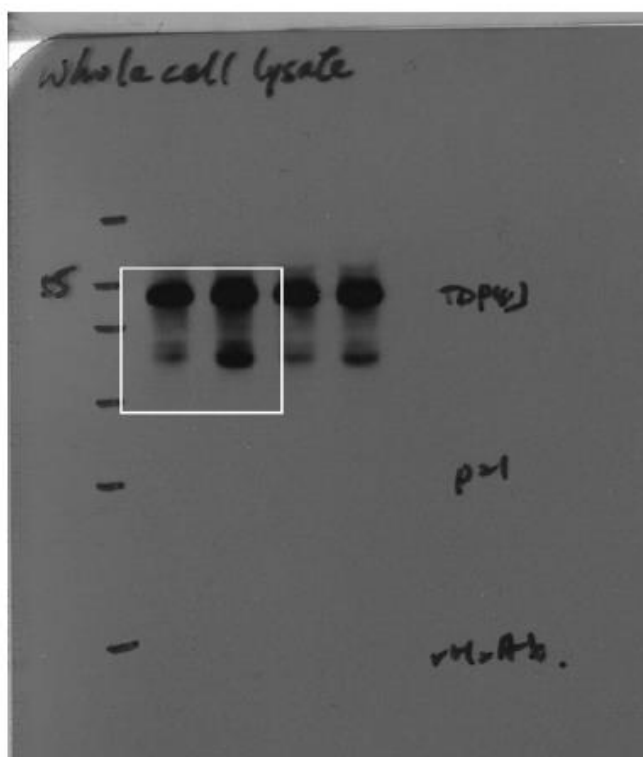

**Tubulin**

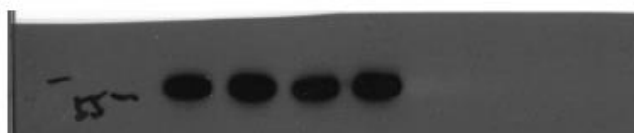

**Fig. 3B**

**HDAC1**

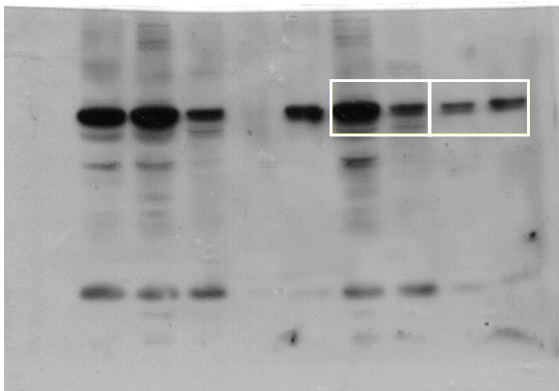

**TDP-43**

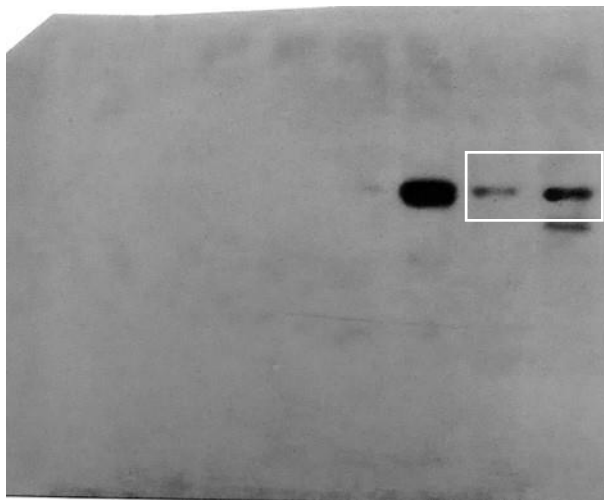

**Tubulin**

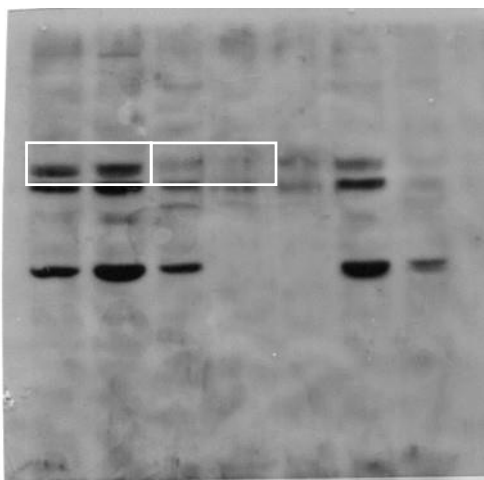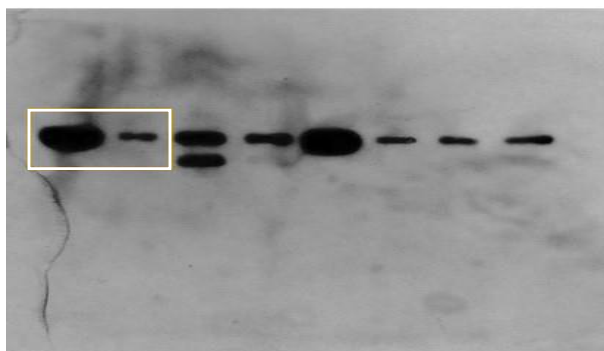

**Lamin A**

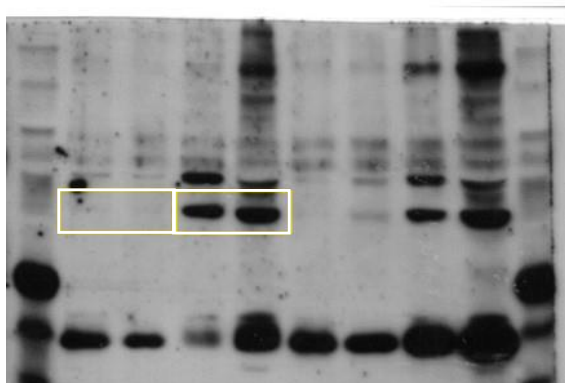

**Fig. 3C**

WT HDAC1

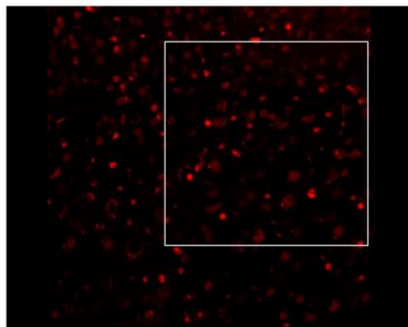

Merge

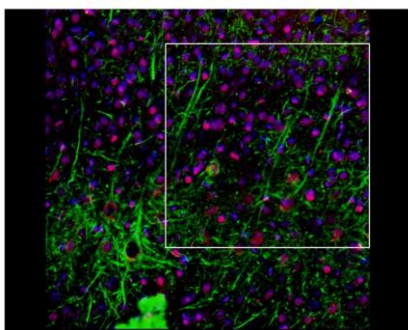

SMI-32

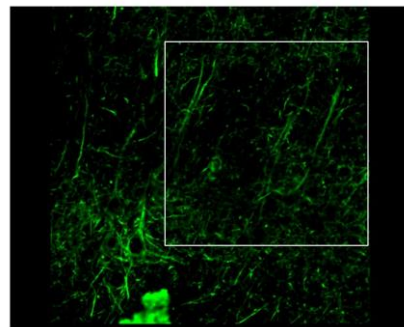

Tg HDAC1

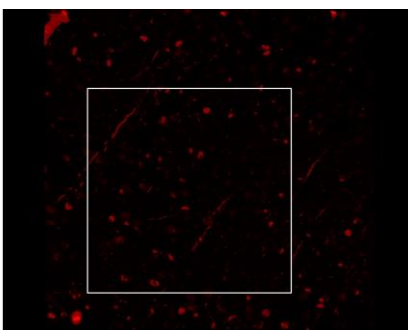

Merge

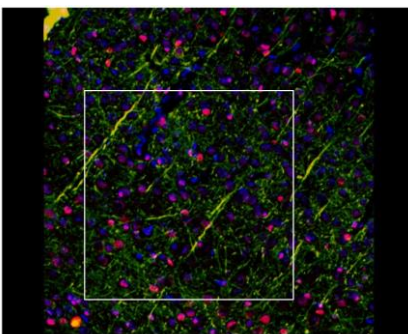

SMI-32

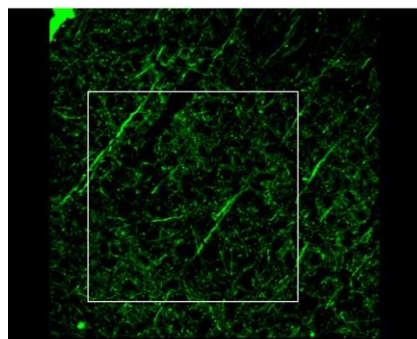

**Fig. 3E**

**Acetyl-H3**

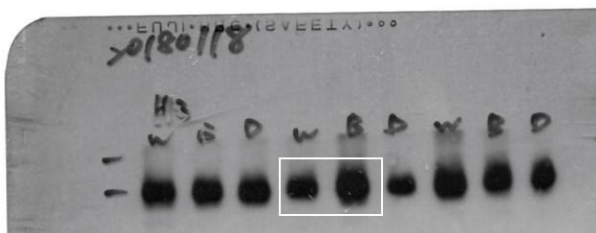

**Total-H3**

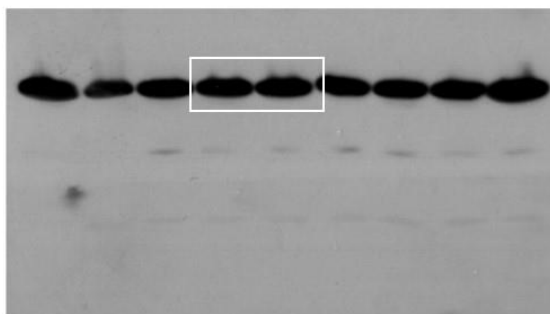

Supplement: EMMM-12-e10622-s005.pdf [file EMMM-12-e10622-s005.pdf]
