# Supplementary material for: HDAC1 dysregulation induces aberrant cell cycle and DNA damage in progress of TDP‐43 proteinopathies
Source: PubMed Central journal article supplement (PMC7278561; doi:10.15252/emmm.201910622), 2020-05-25

**Fig. 4A-1**

**Tg 1m**

**TDP-43**

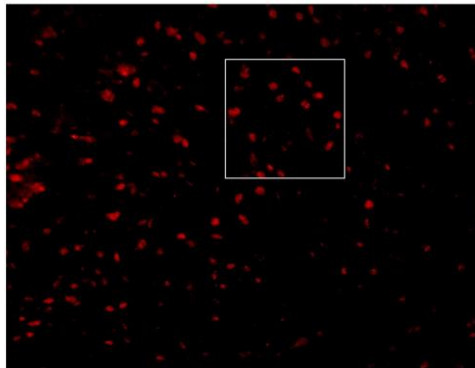

**HDAC1**

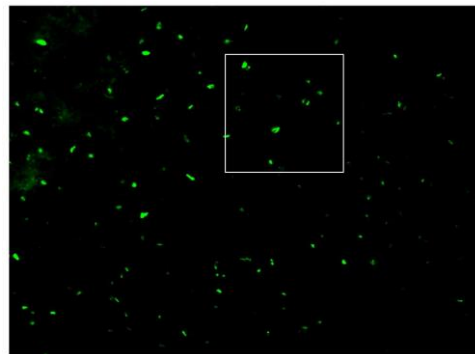

**Merge**

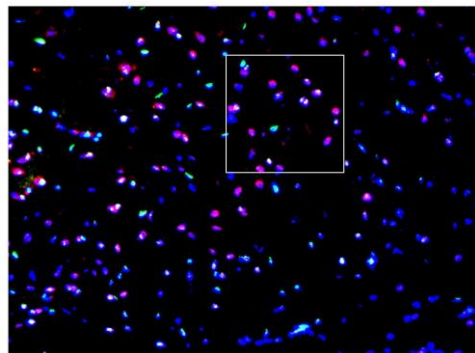

Fig. 4A-2

Tg 6m

TDP-43

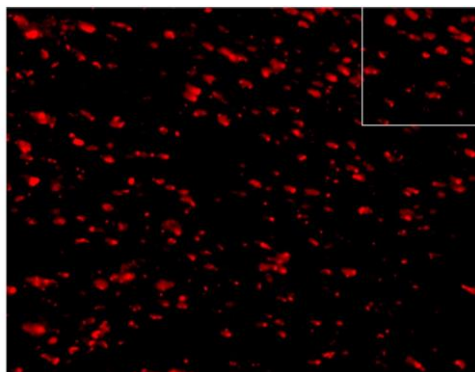

HDAC1

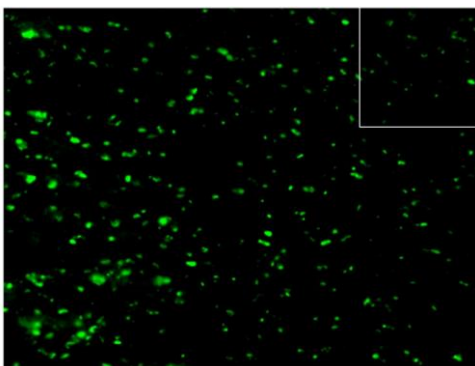

Merge

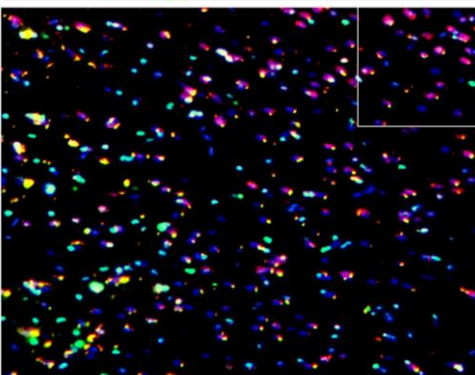

# Fig. 4A-3

Tg 12m

TDP-43

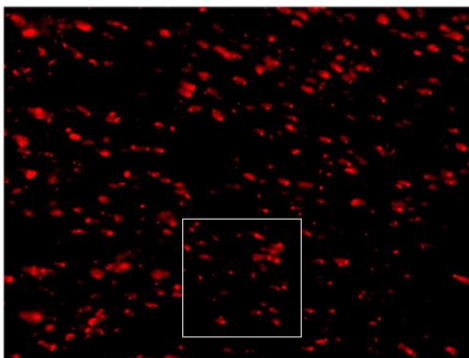

HDAC1

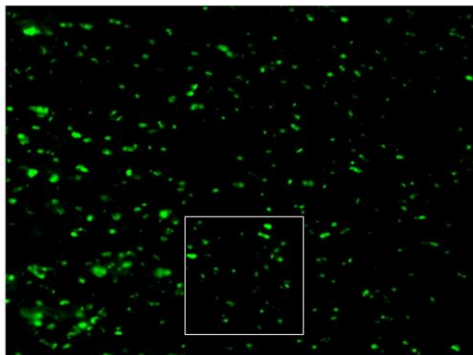

Merge

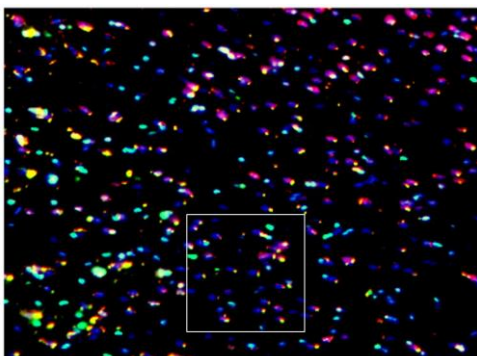

# Fig. 4A-4

WT 12m

TDP-43

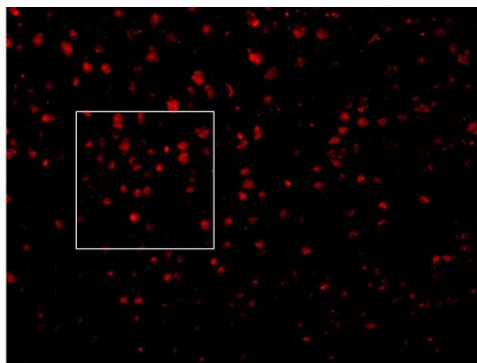

HDAC1

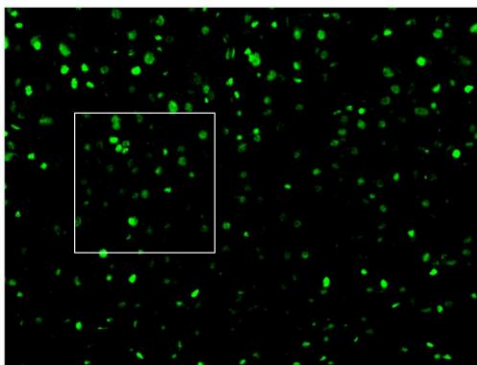

Merge

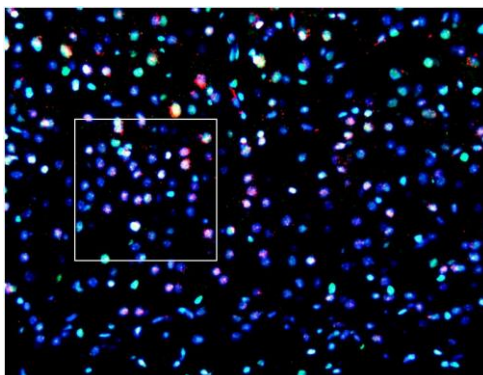

**Fig. 4B**

**Tg**

DAPI

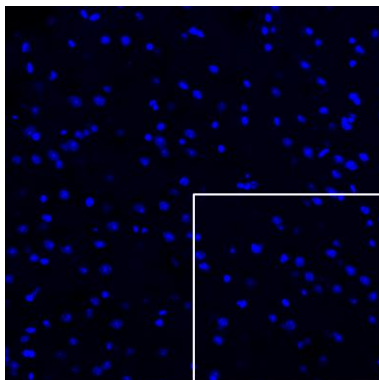

$\gamma$ H2AX

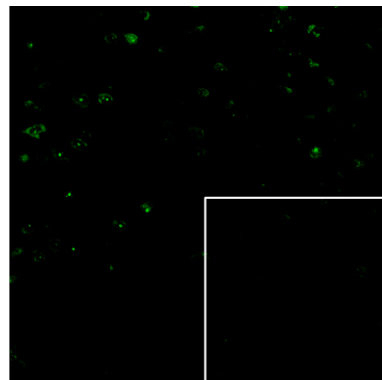

HDAC1

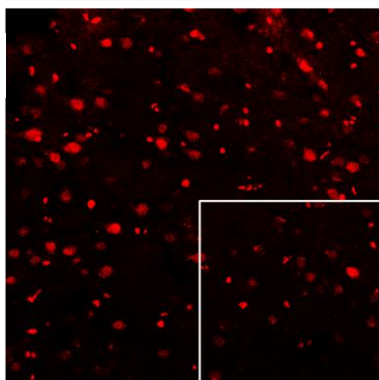

Merge

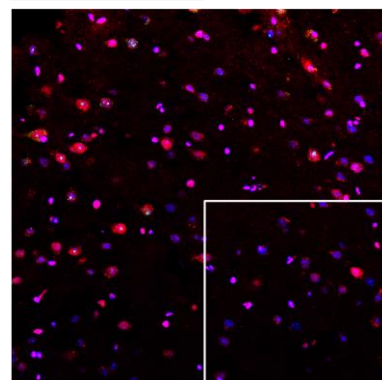

**Tg**

DAPI

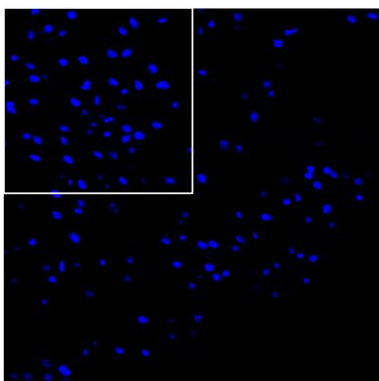

$\gamma$ H2AX

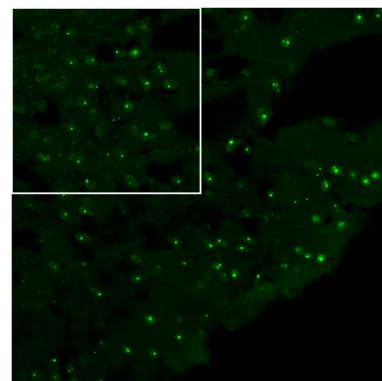

HDAC1

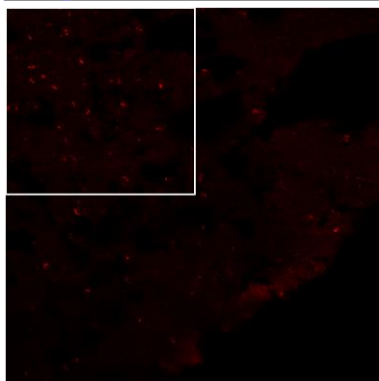

Merge

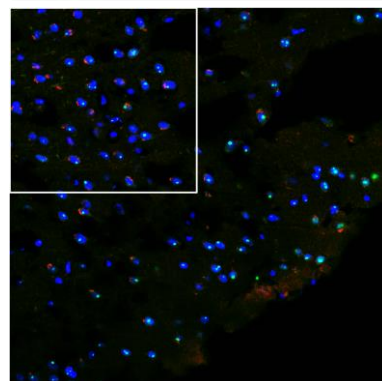

Supplement: EMMM-12-e10622-s006.pdf [file EMMM-12-e10622-s006.pdf]
