# Supplementary material for: HDAC1 dysregulation induces aberrant cell cycle and DNA damage in progress of TDP‐43 proteinopathies
Source: PubMed Central journal article supplement (PMC7278561; doi:10.15252/emmm.201910622), 2020-05-25

**Fig. 7B**

**Acetyl-H3**

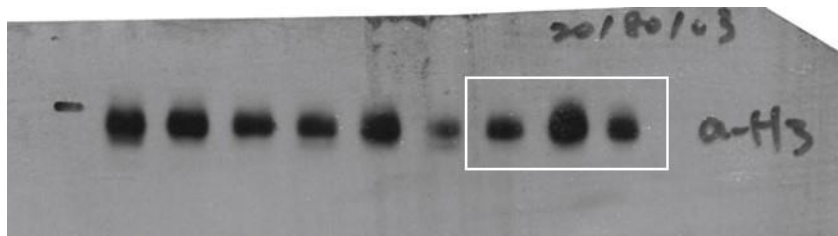

**Total-H3**

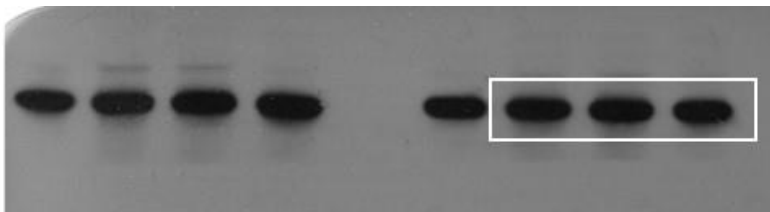

**Fig. 7C**

**Nuclear HDAC1**

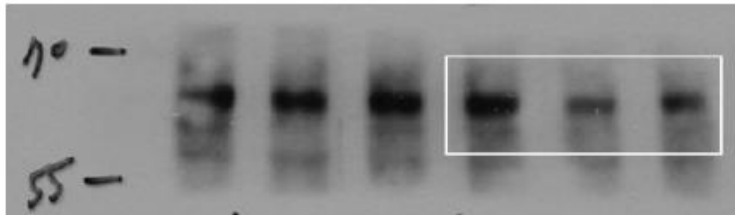

**Lamin A**

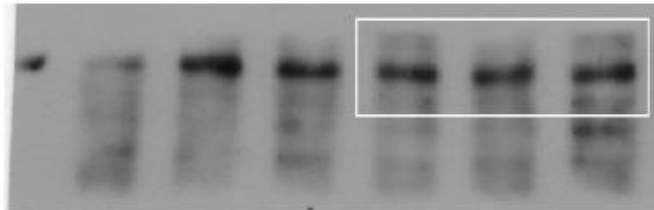

# Fig. 7D

E2F1

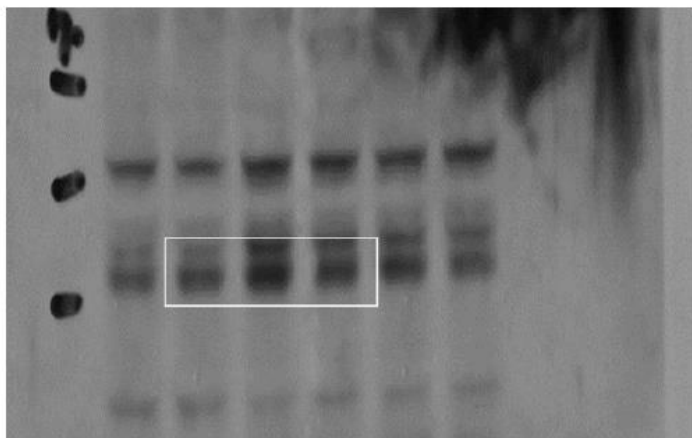

PCNA

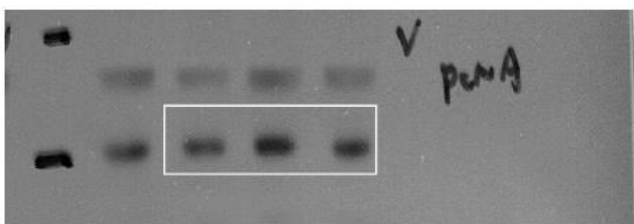

p21

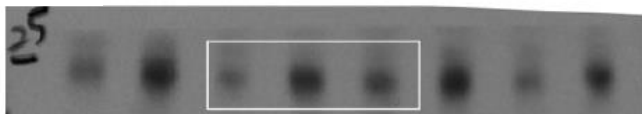

$\gamma$ H2AX

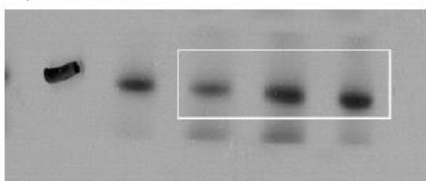

Tubulin

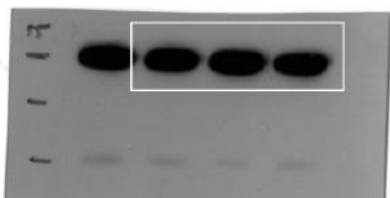

**Fig. 7E**

**WT  
+  
Vehicle**

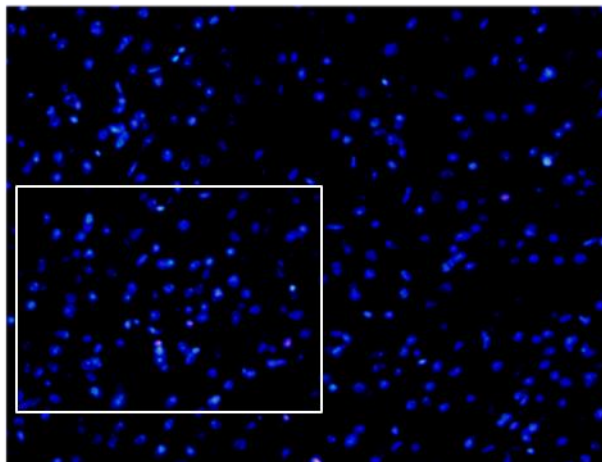

**Tg  
+  
Vehicle**

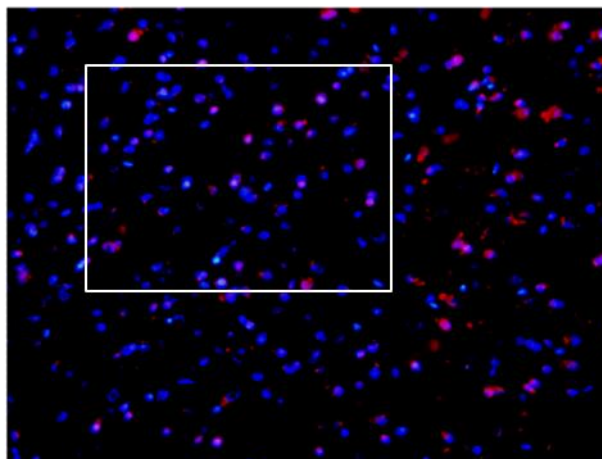

**Tg  
+  
5104434**

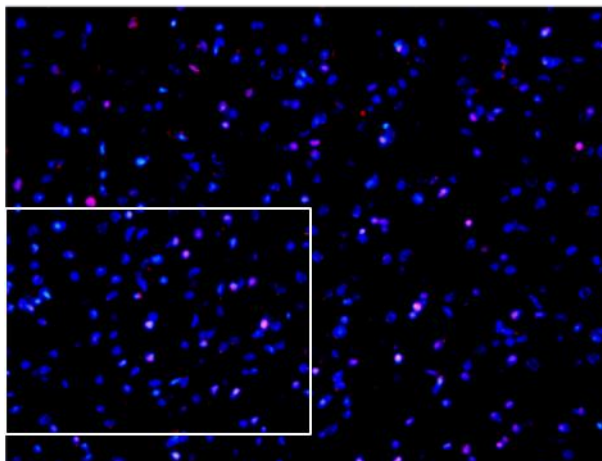

**Fig. 7F**

**WT  
+  
Vehicle**

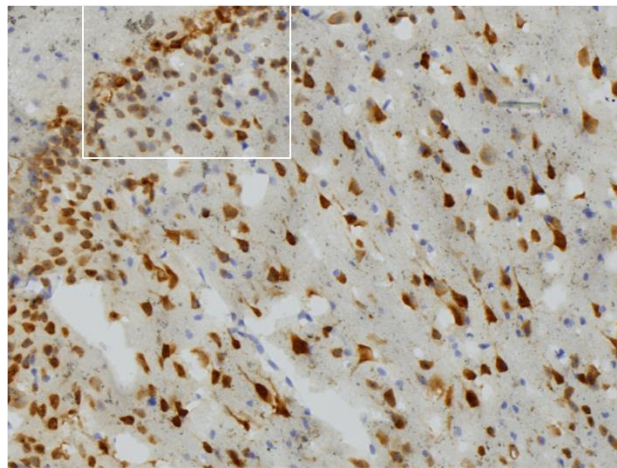

**Tg  
+  
Vehicle**

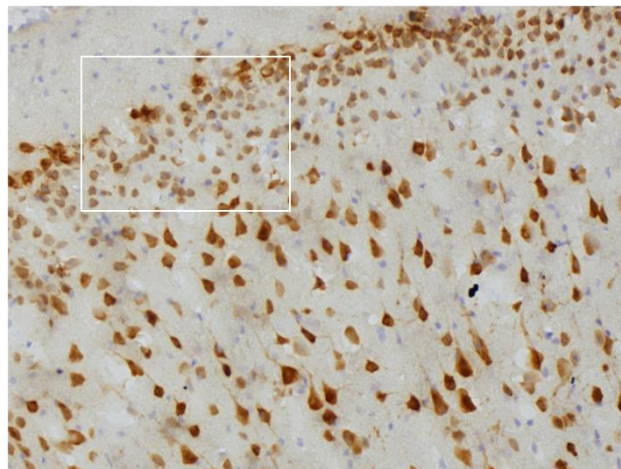

**Tg  
+  
5104434**

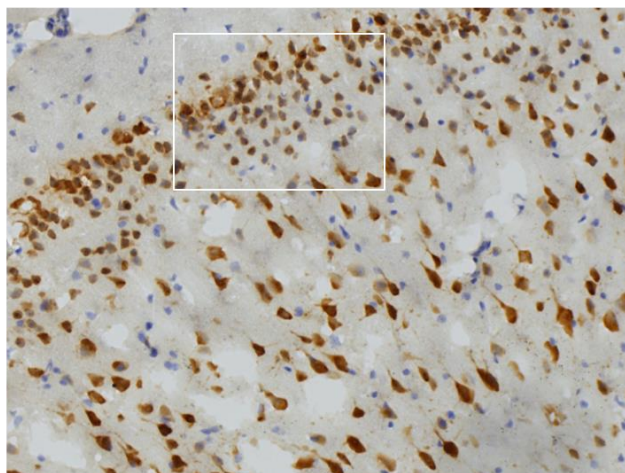

**Fig. 7G**

**WT  
+  
Vehicle**

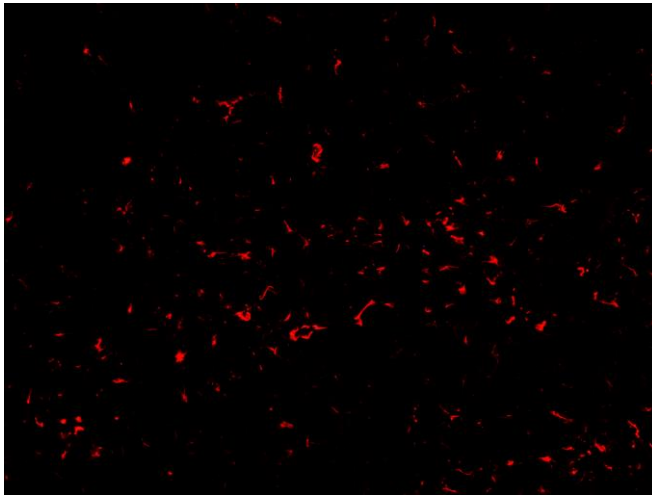

**Tg  
+  
Vehicle**

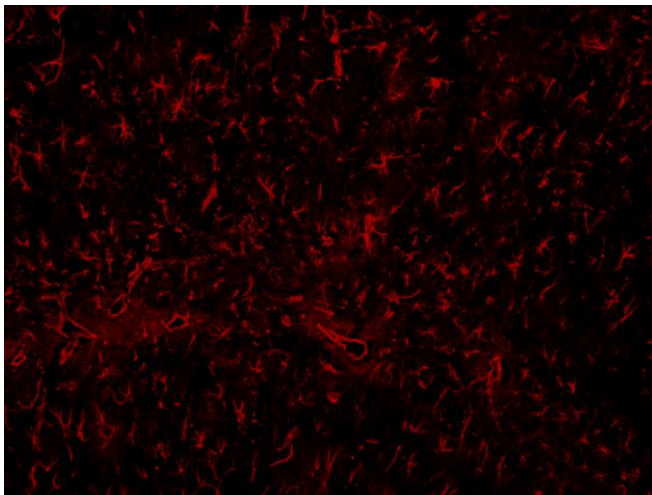

**Tg  
+  
5104434**

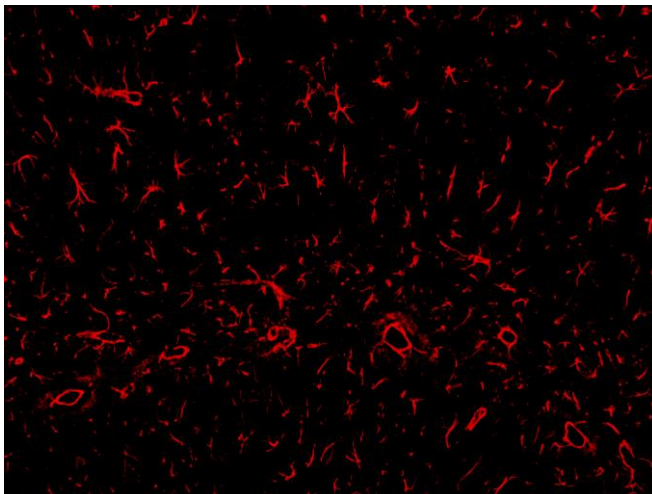

Supplement: EMMM-12-e10622-s008.pdf [file EMMM-12-e10622-s008.pdf]
