# Supplementary material for: HDAC1 dysregulation induces aberrant cell cycle and DNA damage in progress of TDP‐43 proteinopathies
Source: PubMed Central journal article supplement (PMC7278561; doi:10.15252/emmm.201910622), 2020-05-25
Supplement: EMMM-12-e10622-s001.pdf [file EMMM-12-e10622-s001.pdf]

# **HDAC1 Dysregulation Induces Aberrant Cell Cycle and DNA Damage in Progress of TDP-43 Proteinopathies**

Cheng-Chun Wu, Lee-Way Jin, I-Fang Wang, Wei-Yen Wei, Pei-Chuan Ho, Yu-Chih  
Liu and Kuen-Jer Tsai

## **Appendix**

**Table of contents.....page 2**  
**Appendix Figure S1.....page 3**  
**Appendix Supplementary Method.....page 4**  
**Appendix Table S1.....page 5**

Appendix Fig. S1

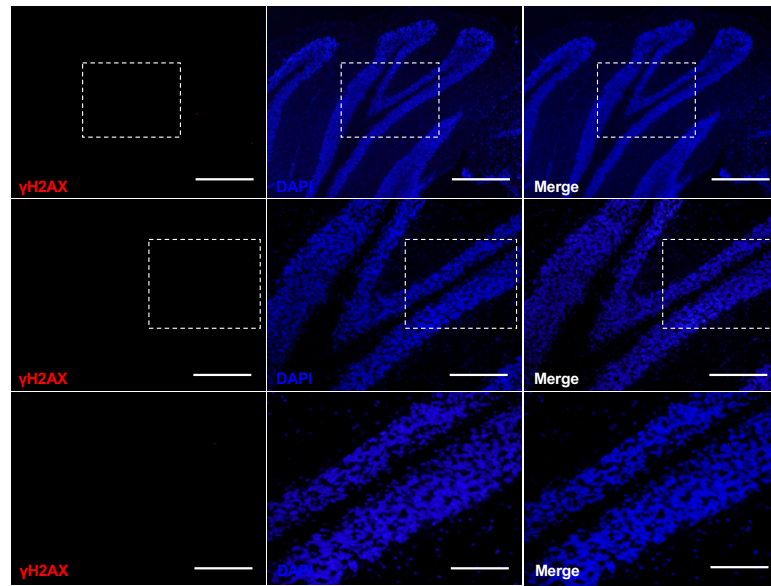

**Appendix Figure S1. Staining of  $\gamma$ H2AX and DAPI in the cerebellum of 12-month-old FTLN-TDP Tg mice.**

Representative IF staining of  $\gamma$ H2AX and DAPI in the cerebellum of 12-month-old FTLN-TDP Tg mice. At this time point, we cannot detect any  $\gamma$ H2AX immunoreactive cells. Upper graph, scale bar: 500  $\mu$ m. The circled area is emphasized for showing the distribution of immunoreactivity in cell subregions. Middle graph, scale bar: 200  $\mu$ m, lower graph, scale bar : 100  $\mu$ m. n= 4 sections per mouse, N = 5 mice per group.

## **Appendix Supplementary Method**

### **Nuclear HDACs activity assay in cell line**

For *in vitro* HDACs activity tests, SHSY5Y cells were cultured in DMEM/F12 medium (Thermo, catalog NO. 11320033) with 10% FBS (Bioindustry, 04-001-1A-US) and were induced to differentiate by neural basal medium (Thermo, catalog NO. 21103049) containing 2% of B27 supplements (Thermo, catalog NO. 17504044), 10  $\mu$ M retinoid acid (Sigma, R2625), and 1% FBS for 5 days, the medium was replaced every day. For compound administration, 1, 10, 50  $\mu$ M of compound 5104434 were treated into differentiated SH-SY5Y cells for 72 hour, the 5104434 contained medium was replaced every day. For the activity assays, the compound 5104434 treated cells were subjected to nuclear extraction following the manual instructions. The activity of HDAC1, 2, 3, 8 were evaluated by using the activity assay kit (Enzo Life Sciences, BML-AK500-0001, BML-AK512, BML-AK531, BML-AK518), total 30  $\mu$ g of nuclear protein from each sample was inputted for the assay.

**Appendix Table 1. List of P value of figure 1C; 6B; 7D and EV4**

**Fig. 1C**

PCR

| WT V.S. Tg   |               | p-value     |      |
|--------------|---------------|-------------|------|
|              | E2F1          | < 0.0001    | **** |
|              | Cyclin E      | 0.025439821 | *    |
|              | PCNA          | 0.013657367 | *    |
|              | p21           | 0.000533315 | ***  |
| Western blot |               |             |      |
| WT V.S. Tg   |               | p-value     |      |
|              | E2F1          | 0.004175469 | **   |
|              | Cyclin A      | 0.036820881 | *    |
|              | PCNA          | 0.00323307  | **   |
|              | p21           | < 0.0001    | **** |
|              | $\gamma$ H2AX | 0.001980008 | **   |

**Fig. 6B**

|        |                           | p-value  |      |
|--------|---------------------------|----------|------|
| trial3 | Tg+Vehicle vs. WT+Vehicle | 0.0004   | ***  |
| trial4 | Tg+Vehicle vs. WT+Vehicle | <0.0001  | **** |
|        | Tg+Vehicle vs. Tg+5104434 | 0.0199   | #    |
| trial5 | Tg+Vehicle vs. WT+Vehicle | <0.0001  | **** |
|        | Tg+Vehicle vs. Tg+5104434 | < 0.0001 | #### |
| trial6 | Tg+Vehicle vs. WT+Vehicle | <0.0001  | **** |
|        | Tg+Vehicle vs. Tg+5104434 | < 0.0001 | #### |

**Fig. 7D**

| WT V.S. Tg         |               | p-value  |      |
|--------------------|---------------|----------|------|
|                    | E2F1          | < 0.0001 | **** |
|                    | PCNA          | 0.0019   | **   |
|                    | p21           | < 0.0001 | **** |
|                    | $\gamma$ H2AX | < 0.0001 | **** |
| Tg V.S. Tg+5104434 |               |          |      |
|                    | E2F1          | < 0.0001 | **** |
|                    | PCNA          | 0.0972   |      |
|                    | p21           | < 0.0001 | **** |
|                    | $\gamma$ H2AX | 0.0005   | ***  |

**Fig. EV4B**

|        |                         | P value |      |
|--------|-------------------------|---------|------|
| trial3 | <i>WT veh vs Tg Veh</i> | <0.0001 | **** |
| trial4 | <i>WT veh vs Tg Veh</i> | <0.0001 | **** |
| trial5 | <i>WT veh vs Tg Veh</i> | <0.0001 | **** |
| trial6 | <i>WT veh vs Tg Veh</i> | <0.0001 | **** |
| trial4 | <i>Tg veh vs Tg 6mg</i> | 0.0438  | #    |

|        |                          |        |     |
|--------|--------------------------|--------|-----|
| trial5 | <i>Tg veh vs Tg 6mg</i>  | 0.0381 | #   |
| trial6 | <i>Tg veh vs Tg 6mg</i>  | 0.0001 | ### |
| trial5 | <i>Tg veh vs Tg 30mg</i> | 0.0489 | @   |
| trial6 | <i>Tg veh vs Tg 30mg</i> | 0.001  | @@@ |

**Fig. EV4D**

|        |                          |         |      |
|--------|--------------------------|---------|------|
| EV4D-1 | EV4D-1                   | P value |      |
|        | <i>WT veh vs Tg Veh</i>  | <0.0001 | **** |
|        | <i>Tg veh vs Tg 6mg</i>  | 0.0041  | **   |
|        | <i>Tg veh vs Tg 30mg</i> | 0.0006  | ***  |
| EV4D-2 | EV4D-2                   | P value |      |
|        | <i>WT veh vs Tg Veh</i>  | <0.0001 | **** |
|        | <i>Tg veh vs Tg 6mg</i>  | 0.0355  | *    |
|        | <i>Tg veh vs Tg 30mg</i> | 0.0091  | **   |

**Fig. EV4E**

|  |                          |         |     |
|--|--------------------------|---------|-----|
|  |                          | P value |     |
|  | <i>WT veh vs Tg Veh</i>  | 0.0002  | *** |
|  | <i>Tg veh vs Tg 6mg</i>  | 0.0119  | *   |
|  | <i>Tg veh vs Tg 30mg</i> | 0.0055  | **  |
