# Supplementary material for: HDAC1 dysregulation induces aberrant cell cycle and DNA damage in progress of TDP‐43 proteinopathies
Source: PubMed Central journal article supplement (PMC7278561; doi:10.15252/emmm.201910622), 2020-05-25

**Fig. 5A**

**Input IP: IgG IP: flag**

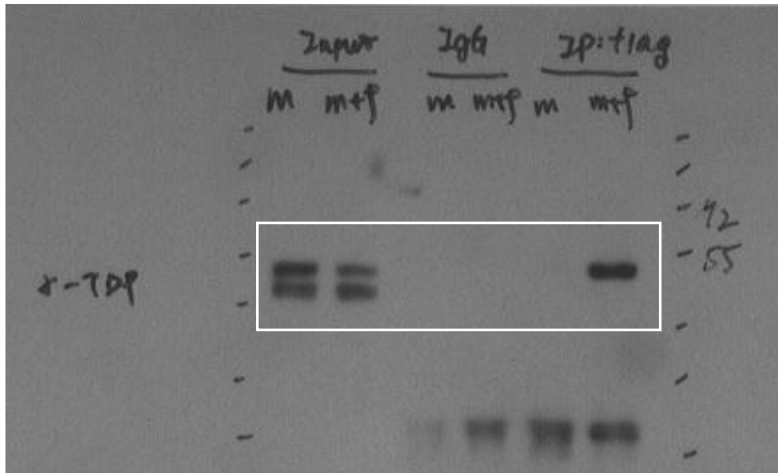

**WB: TDP-43**

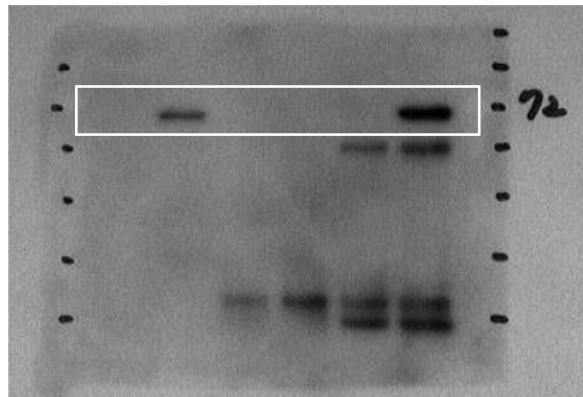

**WB: flag**

**Input IP: IgG IP: myc**

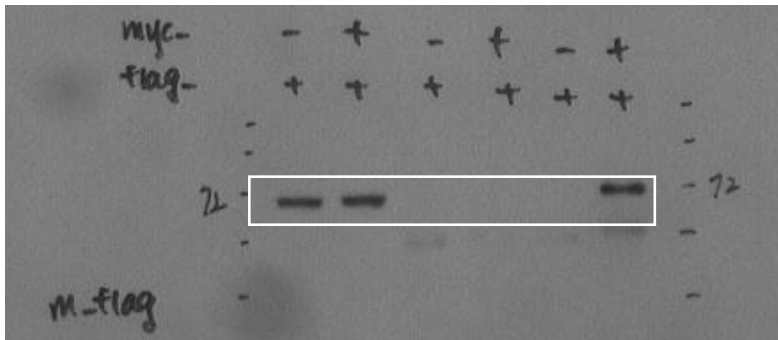

**WB: flag**

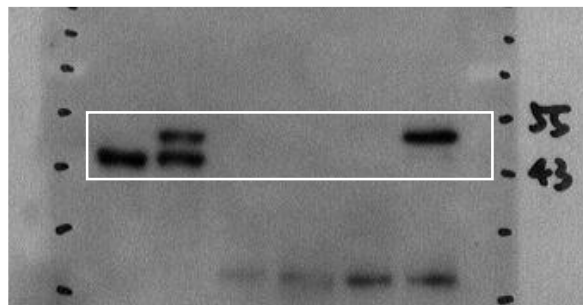

**WB: TDP-43**

## Fig. 5B

### Input

WB: flag

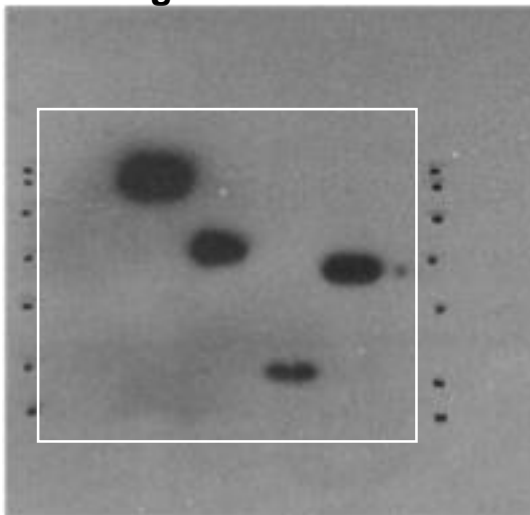

### IP: flag

WB:TDP-43

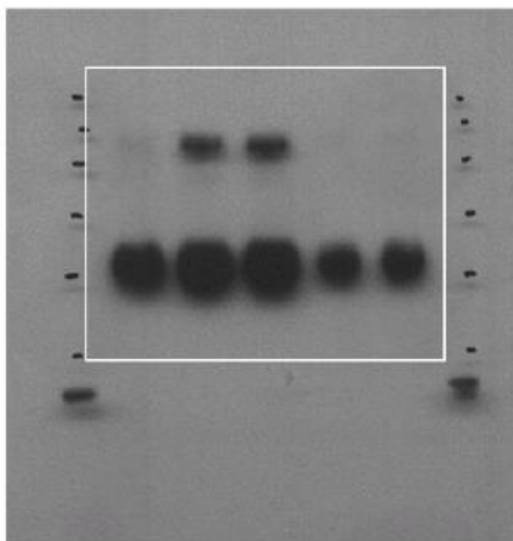

# Fig. 5C

10% input

HDAC1

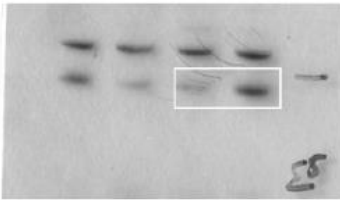

TDP-43

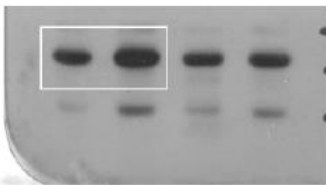

Tubulin

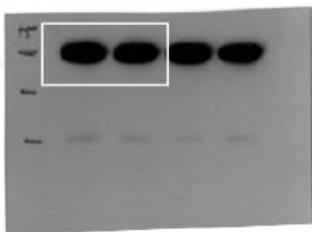

IP: HDAC1

HDAC1

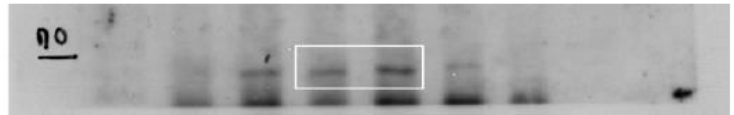

TDP-43

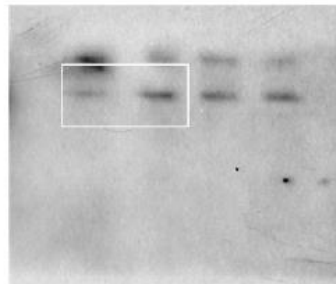

**Fig. 5D**

**HDAC1**

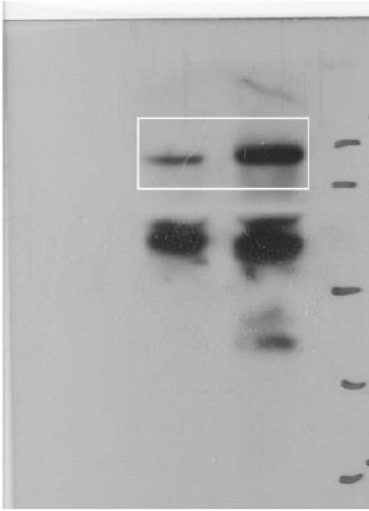

**TDP-43**

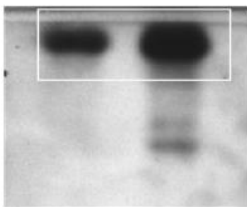

Supplement: EMMM-12-e10622-s007.pdf [file EMMM-12-e10622-s007.pdf]
