# Supplementary material for: HDAC1 dysregulation induces aberrant cell cycle and DNA damage in progress of TDP‐43 proteinopathies
Source: PubMed Central journal article supplement (PMC7278561; doi:10.15252/emmm.201910622), 2020-05-25

**Fig. 8A**

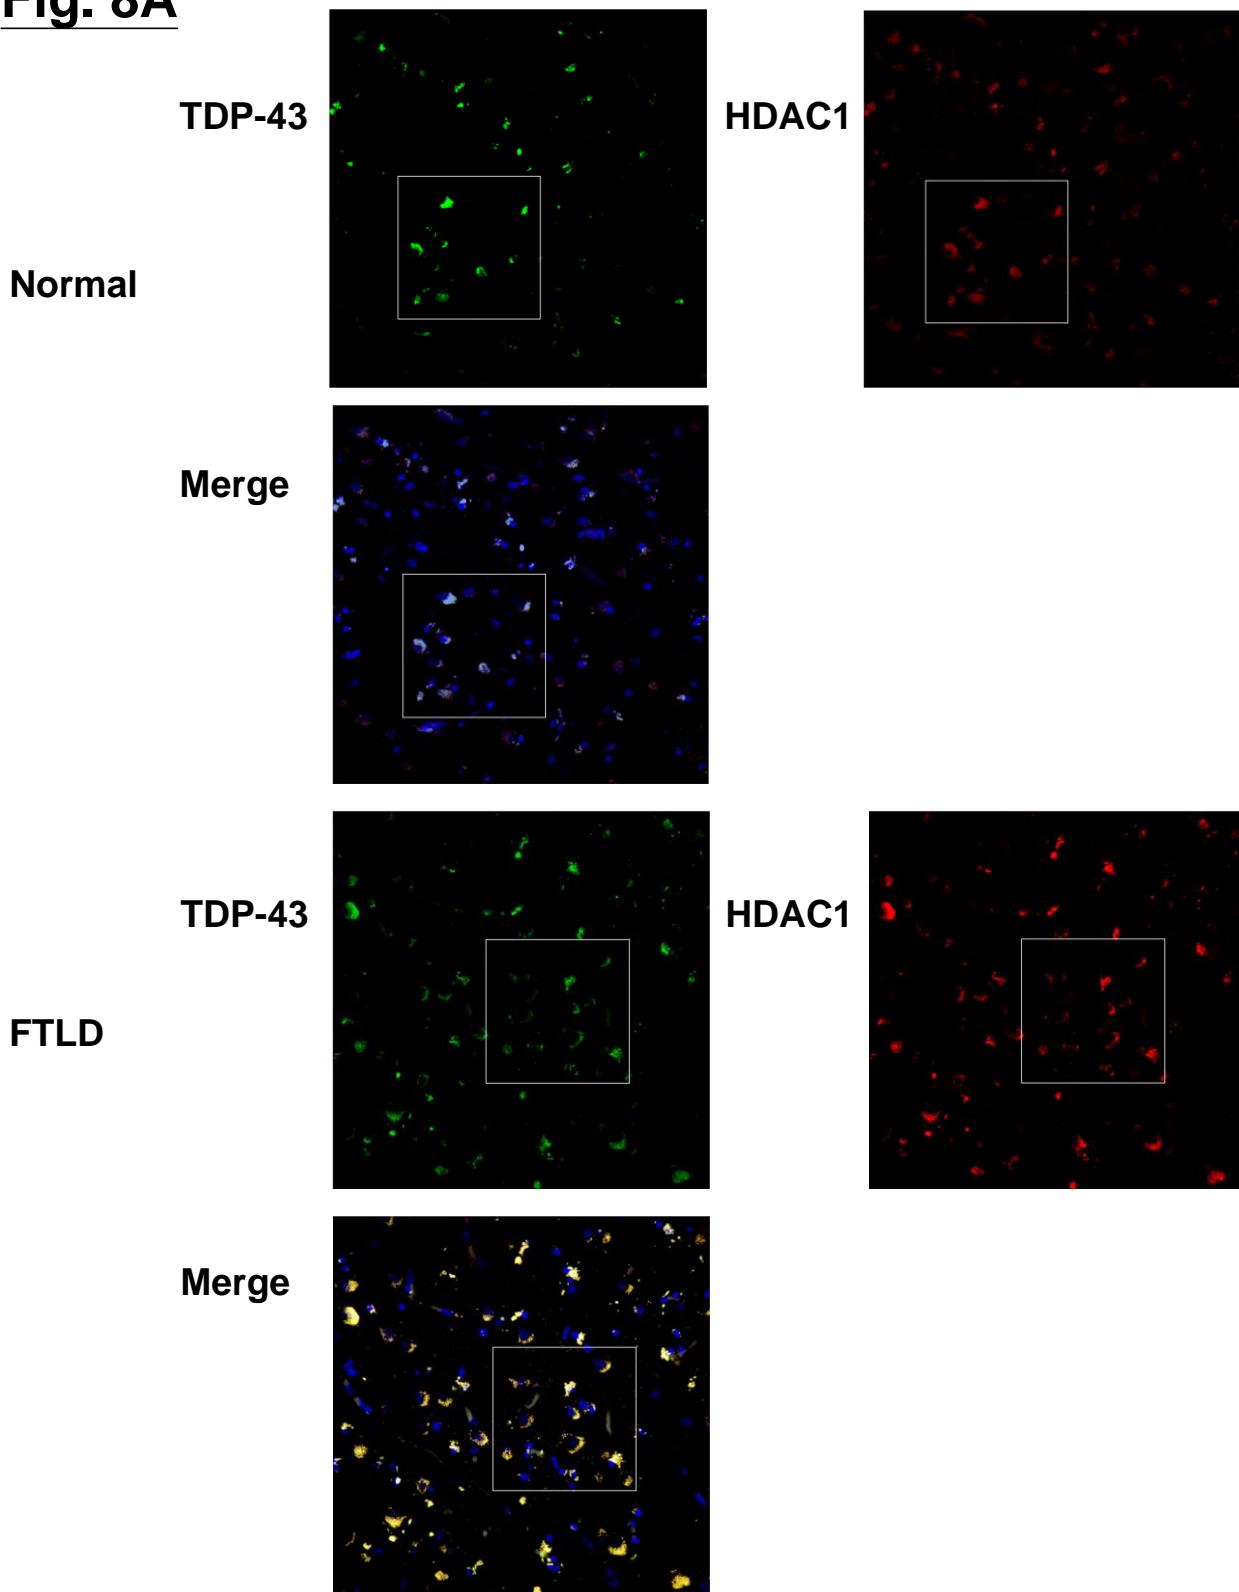

**Fig. 8D**

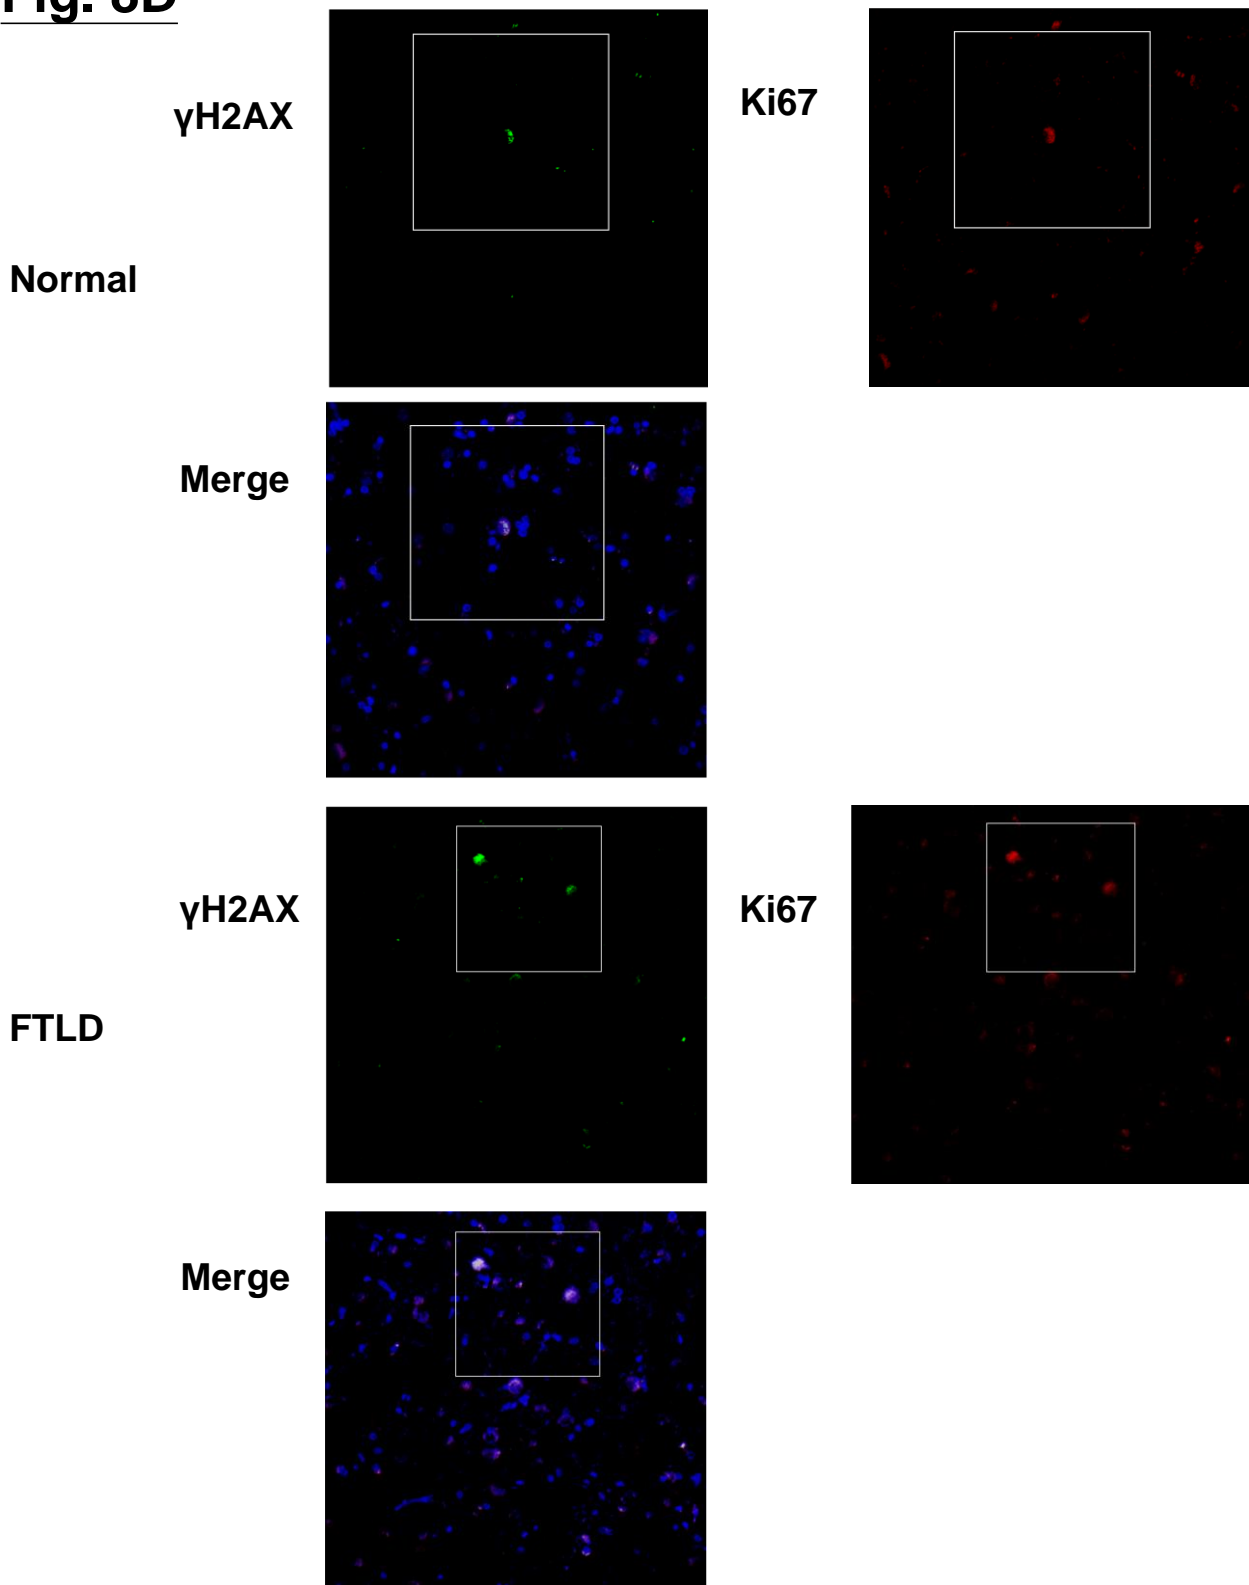

**Fig. 8G**

**HDAC1**

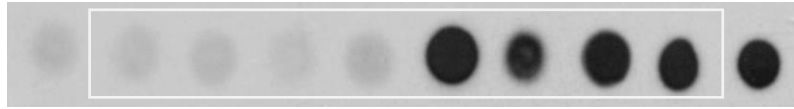

**TDP-43**

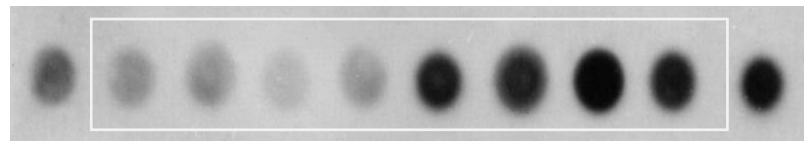

Supplement: EMMM-12-e10622-s009.pdf [file EMMM-12-e10622-s009.pdf]
